# Supplementary material for: Multi-omics reveals lactylation-driven regulatory mechanisms promoting tumor progression in oral squamous cell carcinoma
Source: PubMed Central journal article supplement — Genome Biol. 2024 Oct 15;25:272. doi: 10.1186/s13059-024-03383-8 (PMC11476802; doi:10.1186/s13059-024-03383-8), 2024-10-15

**Additional file 3. Uncropped western blot images.**

**Main Fig.1b**

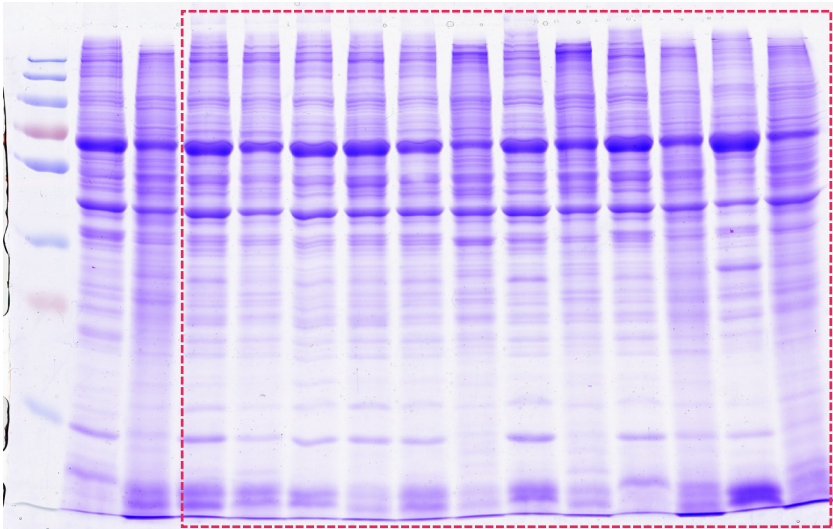

**pan-Kla**

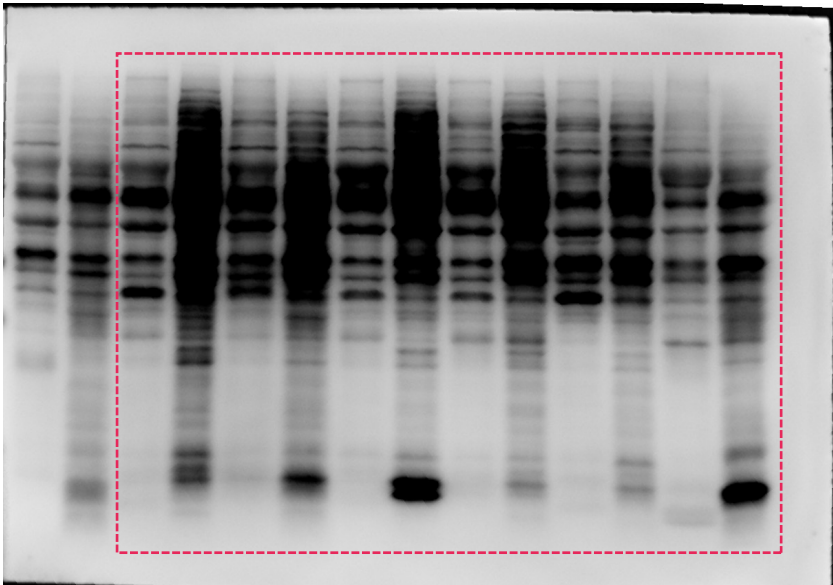

**Main Fig. 4c**

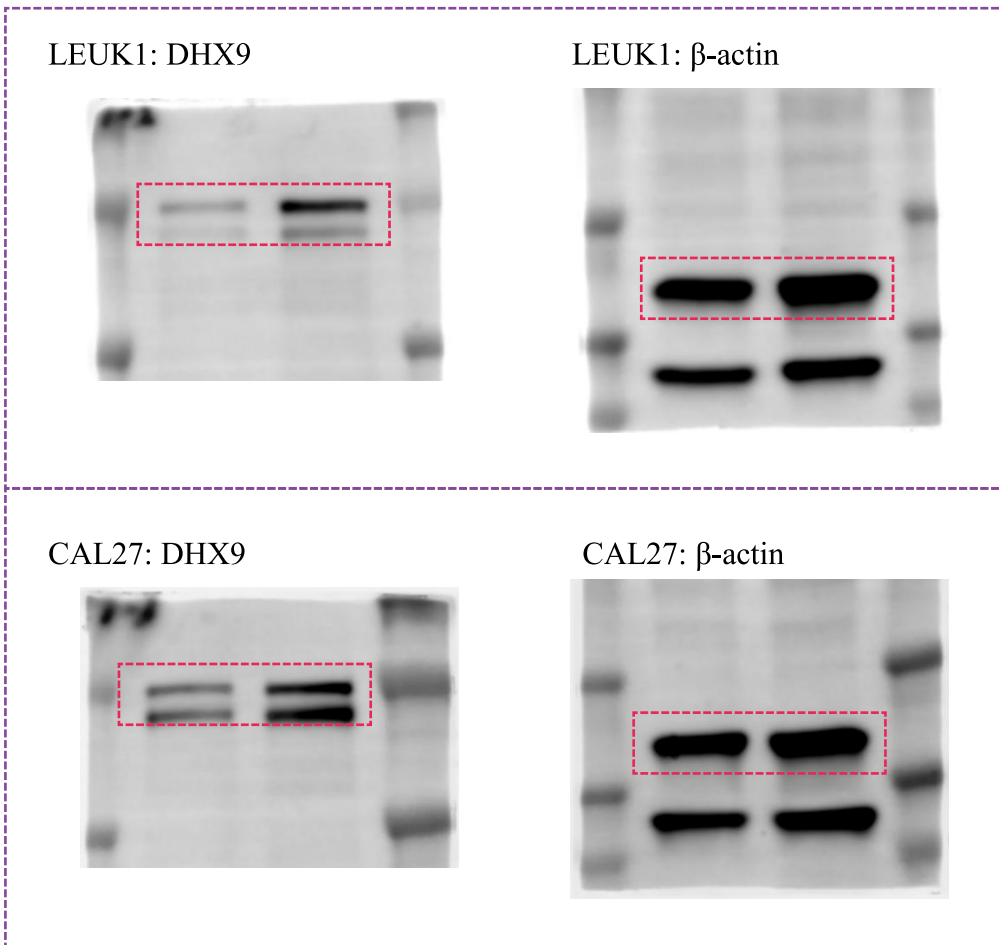

**Main Fig. 4i**

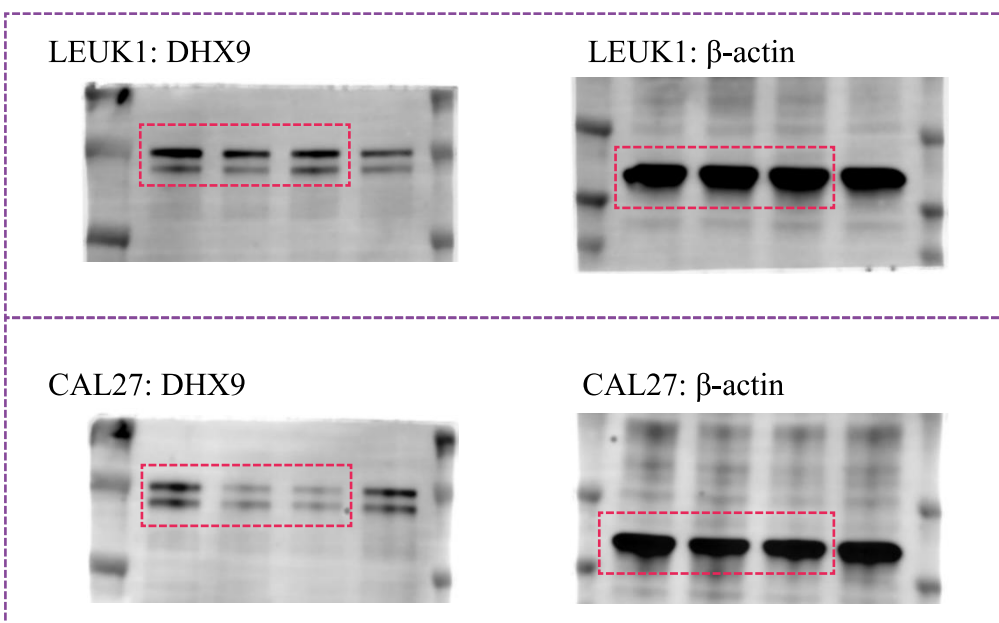

**Main Fig. 5a**

LEUK1

input: DHX9

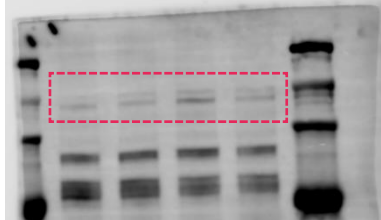

input:  $\beta$ -actin

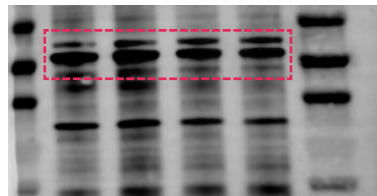

IgG: DHX9

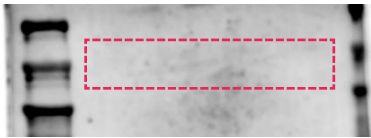

IgG:Kla

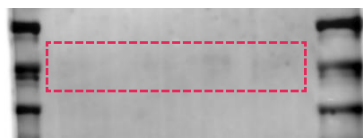

ip: DHX9

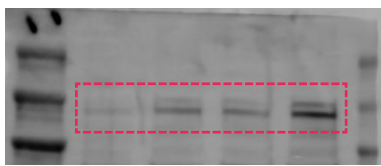

ip: Kla

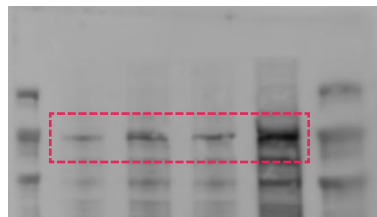

CAL27

input: DHX9

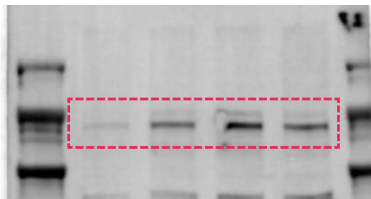

input:  $\beta$  actin

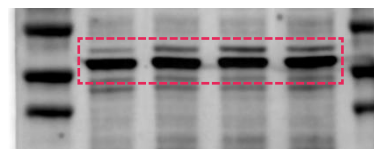

IgG: DHX9

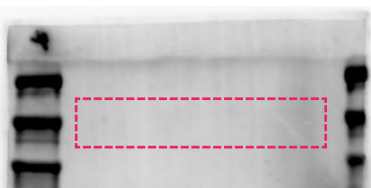

IgG:Kla

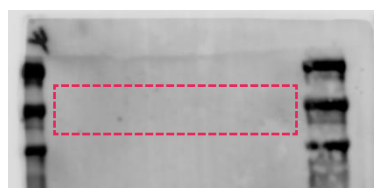

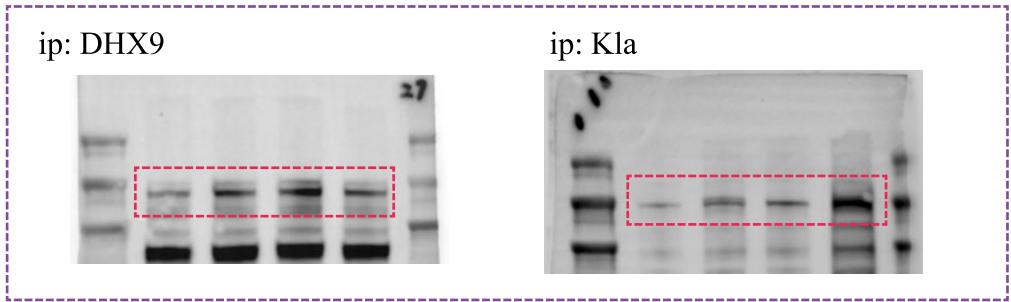

**Fig. S5a**

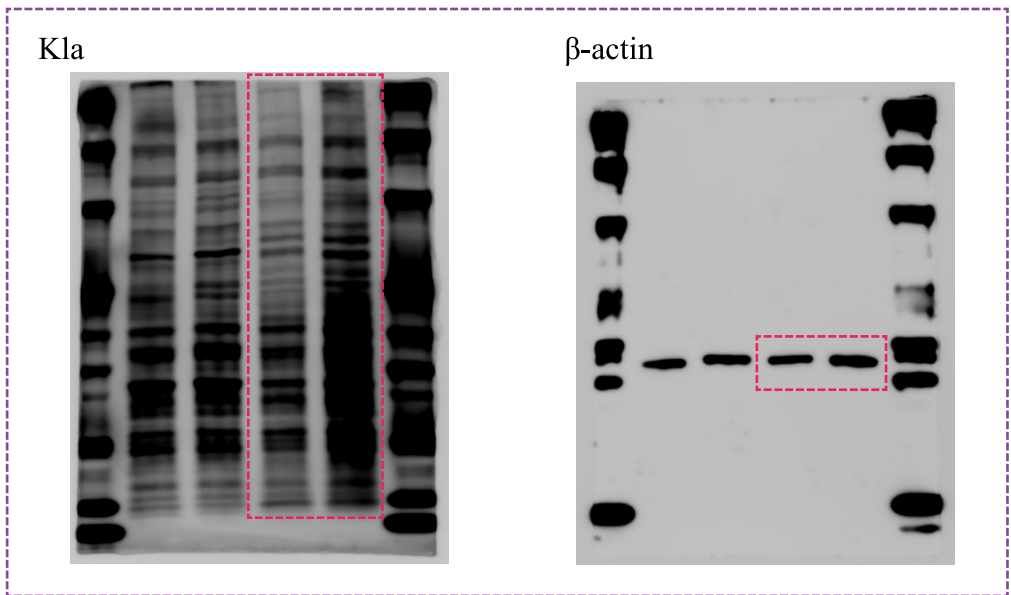

Supplement: 13059_2024_3383_MOESM3_ESM.pdf [file 13059_2024_3383_MOESM3_ESM.pdf]
